# Supplementary material for: Serum Phospholipid Profile Changes in Gaucher Disease and Parkinson’s Disease
Source: MDPI journal article supplement (doi:10.3390/ijms231810387), 2022-09-08
Supplement: s1 [file s1]

### Supplementary Table S1.

**Serum lipid level alterations in the Iberian GD and PD cohort. Absolute lipid levels.** Lipid data are expressed as normalized intensities relative to exactly measured internal standards and constitute relative abundances per ml plasma.

Sample number 1-100: PD, 101-119: GBA-PD, 132-231: controls, 232-301: GD

| Sample number | PC      | P-PC   | LPC     | PE     | P-PE   | LPE    | PS     | LPS  | PI     | PG    | Total PL |
|---------------|---------|--------|---------|--------|--------|--------|--------|------|--------|-------|----------|
| 1             | 59592.7 | 500.4  | 10927.3 | 1718.1 | 1790.5 | 506.0  | 206.6  | 17.5 | 4934.5 | 42.7  | 80236.3  |
| 2             | 54147.5 | 657.9  | 7184.0  | 1746.6 | 1443.4 | 316.0  | 434.1  | 16.4 | 3281.6 | 36.3  | 69263.8  |
| 3             | 59452.0 | 549.7  | 12598.7 | 2438.9 | 2088.9 | 922.8  | 341.5  | 20.1 | 3949.4 | 31.8  | 82393.7  |
| 4             | 61894.4 | 815.3  | 11030.0 | 1793.4 | 2705.4 | 734.9  | 365.2  | 19.7 | 4892.5 | 7.7   | 84258.7  |
| 5             | 60124.4 | 645.3  | 11373.3 | 759.5  | 2650.3 | 604.6  | 269.3  | 24.3 | 3239.0 | 35.0  | 79724.9  |
| 6             | 59922.6 | 1160.3 | 13092.1 | 1164.6 | 1509.2 | 658.0  | 500.9  | 16.3 | 3352.7 | 45.6  | 81422.5  |
| 7             | 55499.6 | 797.3  | 10017.0 | 1648.8 | 1730.3 | 696.5  | 435.3  | 15.2 | 3912.9 | 32.6  | 74785.5  |
| 8             | 53967.7 | 1175.4 | 10591.7 | 1560.2 | 2487.9 | 564.4  | 115.1  | 14.0 | 5303.7 | 43.3  | 75823.4  |
| 9             | 65923.9 | 1162.8 | 12196.5 | 1718.7 | 1796.6 | 884.8  | 214.7  | 21.2 | 4392.1 | 42.0  | 88353.4  |
| 10            | 52781.7 | 674.4  | 12181.1 | 1627.9 | 2073.0 | 1004.4 | 288.1  | 15.1 | 3223.4 | 33.5  | 73902.7  |
| 11            | 43444.9 | 876.2  | 10415.7 | 838.2  | 1321.3 | 576.4  | 170.0  | 15.0 | 2245.2 | 36.2  | 59939.3  |
| 12            | 59149.2 | 797.7  | 9374.9  | 2579.9 | 1749.6 | 625.3  | 446.4  | 10.8 | 3912.6 | 41.5  | 78687.9  |
| 13            | 67039.4 | 691.0  | 13388.8 | 1665.4 | 2325.1 | 817.4  | 125.7  | 26.9 | 3134.2 | 52.7  | 89266.6  |
| 14            | 65807.3 | 1539.3 | 11970.7 | 2196.4 | 3114.0 | 746.3  | 889.5  | 31.2 | 4215.5 | 39.0  | 90549.1  |
| 15            | 60043.8 | 1003.3 | 12614.4 | 1767.9 | 2456.2 | 696.6  | 269.3  | 13.6 | 2565.1 | 51.2  | 81481.4  |
| 16            | 67038.8 | 1244.4 | 11680.4 | 2899.8 | 2987.8 | 816.3  | 586.9  | 14.6 | 2419.4 | 9.3   | 89697.7  |
| 17            | 66315.1 | 686.2  | 13527.7 | 2287.2 | 2264.0 | 763.2  | 500.5  | 19.9 | 3818.9 | 44.7  | 90227.4  |
| 18            | 79086.3 | 775.5  | 9432.1  | 993.2  | 4130.4 | 327.9  | 3952.1 | 26.9 | 3052.1 | 158.4 | 101934.9 |
| 19            | 65582.2 | 884.9  | 10611.0 | 976.9  | 1964.9 | 494.2  | 560.0  | 19.6 | 3495.6 | 50.0  | 84639.2  |
| 20            | 62553.5 | 1901.0 | 12234.9 | 1888.4 | 4147.5 | 780.0  | 118.2  | 23.5 | 4087.8 | 45.0  | 87779.7  |

|    |         |        |         |        |        |        |       |      |        |      |          |
|----|---------|--------|---------|--------|--------|--------|-------|------|--------|------|----------|
| 21 | 75024.2 | 1224.8 | 13119.4 | 1394.6 | 2531.0 | 642.2  | 103.4 | 18.2 | 4944.1 | 53.1 | 99055.1  |
| 22 | 56805.9 | 1146.0 | 11290.4 | 1048.0 | 2568.3 | 632.7  | 277.8 | 15.7 | 3455.2 | 40.5 | 77280.6  |
| 23 | 69615.7 | 1926.4 | 13599.3 | 2528.5 | 4097.6 | 834.5  | 250.9 | 11.9 | 4533.7 | 53.5 | 97452.0  |
| 24 | 73642.4 | 1288.8 | 12816.3 | 860.4  | 2551.8 | 646.5  | 583.6 | 29.4 | 4108.3 | 59.1 | 96586.5  |
| 25 | 65875.1 | 1289.7 | 10871.2 | 2063.7 | 2403.1 | 565.6  | 316.4 | 26.9 | 2784.0 | 49.3 | 86245.1  |
| 26 | 63887.1 | 1164.8 | 11985.6 | 1224.4 | 3412.3 | 699.4  | 79.7  | 20.3 | 3250.4 | 52.4 | 85776.3  |
| 27 | 70964.8 | 1080.8 | 12849.5 | 1681.6 | 3257.1 | 696.2  | 303.8 | 25.5 | 4841.8 | 54.7 | 95755.7  |
| 28 | 59287.8 | 1113.0 | 9827.6  | 1449.1 | 2797.0 | 574.6  | 126.4 | 12.9 | 3295.7 | 41.6 | 78525.8  |
| 29 | 61503.4 | 1373.7 | 11488.9 | 2036.4 | 3323.4 | 935.2  | 404.8 | 21.0 | 3557.6 | 47.4 | 84691.7  |
| 30 | 95543.5 | 1415.4 | 15731.9 | 3194.8 | 3432.2 | 1045.1 | 349.1 | 18.8 | 7015.3 | 48.7 | 127794.9 |
| 31 | 51232.5 | 710.4  | 10556.9 | 672.7  | 1817.4 | 433.8  | 464.0 | 18.3 | 1622.1 | 37.5 | 67565.6  |
| 32 | 65531.1 | 814.7  | 13122.9 | 1391.4 | 1712.6 | 1025.4 | 385.8 | 16.8 | 2616.0 | 45.7 | 86662.5  |
| 33 | 65801.7 | 1131.3 | 10304.0 | 1613.2 | 2706.5 | 526.3  | 296.1 | 22.7 | 1935.8 | 57.4 | 84395.1  |
| 34 | 77528.6 | 1167.2 | 13933.1 | 1969.0 | 3440.1 | 731.5  | 394.4 | 18.8 | 5606.5 | 57.5 | 104846.6 |
| 35 | 60531.1 | 876.8  | 13056.5 | 1303.7 | 4740.4 | 772.0  | 545.4 | 16.4 | 3219.4 | 46.0 | 85107.8  |
| 36 | 78003.3 | 1092.7 | 11501.9 | 1629.3 | 1853.8 | 710.0  | 200.1 | 22.0 | 5577.9 | 57.8 | 100648.7 |
| 37 | 66545.4 | 815.0  | 11235.4 | 2140.7 | 2651.5 | 810.6  | 987.7 | 46.0 | 3467.8 | 45.6 | 88745.6  |
| 38 | 59138.2 | 909.2  | 11458.1 | 914.1  | 1953.8 | 677.2  | 524.2 | 14.4 | 6218.6 | 45.9 | 81853.7  |
| 39 | 48777.5 | 624.5  | 11566.7 | 1751.1 | 2592.8 | 893.2  | 506.8 | 20.4 | 3735.9 | 27.7 | 70496.7  |
| 40 | 73074.1 | 1330.0 | 10630.6 | 2332.3 | 2186.4 | 670.5  | 490.0 | 16.0 | 4386.9 | 56.8 | 95173.6  |
| 41 | 58858.0 | 751.8  | 12727.2 | 1423.7 | 2687.1 | 439.2  | 377.1 | 16.5 | 2581.7 | 50.3 | 79912.6  |
| 42 | 62893.5 | 1105.1 | 11404.9 | 1710.5 | 1805.4 | 702.0  | 675.6 | 19.1 | 3716.1 | 52.9 | 84085.1  |
| 43 | 64325.4 | 998.1  | 11693.9 | 1013.9 | 1972.3 | 558.7  | 578.3 | 18.9 | 3091.5 | 50.9 | 84301.9  |
| 44 | 82794.0 | 1550.4 | 12250.8 | 3138.9 | 2362.9 | 823.0  | 747.3 | 21.2 | 4739.4 | 64.8 | 108492.8 |
| 45 | 72380.3 | 1063.4 | 13699.1 | 2753.5 | 3645.1 | 1074.4 | 279.6 | 23.9 | 3915.6 | 12.6 | 98847.5  |
| 46 | 60808.7 | 736.6  | 10413.7 | 1133.6 | 2903.1 | 521.9  | 526.4 | 17.0 | 2734.4 | 49.9 | 79845.3  |
| 47 | 50863.3 | 1149.4 | 7739.3  | 546.0  | 1181.8 | 337.3  | 330.3 | 14.5 | 2818.0 | 44.2 | 65024.2  |
| 48 | 56520.9 | 1048.7 | 15054.6 | 2674.0 | 2621.3 | 875.9  | 474.3 | 17.0 | 4324.3 | 50.4 | 83661.4  |
| 49 | 69007.4 | 1086.9 | 9857.9  | 1998.9 | 2885.5 | 547.2  | 165.4 | 17.0 | 5147.4 | 54.0 | 90767.6  |
| 50 | 45955.7 | 750.2  | 8739.0  | 1415.7 | 1728.5 | 615.5  | 294.4 | 24.7 | 3518.8 | 36.8 | 63079.3  |
| 51 | 74033.6 | 874.0  | 12634.5 | 1908.6 | 3319.3 | 892.1  | 247.3 | 12.7 | 5118.0 | 53.0 | 99092.9  |

|    |         |        |         |        |        |        |        |      |        |      |          |
|----|---------|--------|---------|--------|--------|--------|--------|------|--------|------|----------|
| 52 | 74868.7 | 1121.9 | 12176.9 | 2497.7 | 3321.5 | 1181.3 | 144.2  | 19.4 | 4990.9 | 60.2 | 100382.7 |
| 53 | 68366.8 | 1125.3 | 10325.4 | 2596.6 | 3208.5 | 568.0  | 414.0  | 19.7 | 3977.9 | 59.3 | 90661.5  |
| 54 | 55723.8 | 1122.0 | 9381.3  | 2628.2 | 1674.6 | 716.3  | 251.3  | 27.7 | 3768.2 | 47.9 | 75341.3  |
| 55 | 53380.2 | 1156.5 | 12152.4 | 2550.8 | 2196.9 | 1035.0 | 729.1  | 17.5 | 4255.3 | 54.8 | 77528.5  |
| 56 | 60376.3 | 848.0  | 8274.6  | 1658.3 | 2562.8 | 550.4  | 638.7  | 25.1 | 3306.9 | 47.8 | 78288.9  |
| 57 | 65393.1 | 1412.8 | 11519.0 | 1976.3 | 3299.1 | 757.2  | 285.1  | 17.5 | 3932.3 | 67.1 | 88659.5  |
| 58 | 68441.3 | 1197.0 | 10014.2 | 3348.7 | 2418.6 | 655.5  | 143.6  | 19.8 | 2851.8 | 67.2 | 89157.7  |
| 59 | 53441.1 | 716.5  | 11586.4 | 1391.5 | 2653.4 | 1048.3 | 439.6  | 33.0 | 3291.7 | 36.8 | 74638.2  |
| 60 | 61257.0 | 1595.1 | 8699.3  | 1520.3 | 1781.2 | 551.0  | 438.5  | 21.1 | 3754.6 | 55.8 | 79673.8  |
| 61 | 60076.4 | 1002.6 | 11832.6 | 3067.8 | 3209.3 | 1181.1 | 623.7  | 34.8 | 4739.9 | 52.5 | 85820.6  |
| 62 | 59683.4 | 961.4  | 7984.9  | 1478.4 | 1879.8 | 605.7  | 107.7  | 18.5 | 3191.0 | 46.0 | 75956.9  |
| 63 | 60912.3 | 1406.4 | 11679.0 | 2419.4 | 2342.5 | 639.7  | 577.6  | 28.9 | 4689.0 | 54.4 | 84749.1  |
| 64 | 65576.9 | 1300.1 | 10909.2 | 1449.8 | 2499.5 | 557.7  | 843.4  | 27.0 | 4308.2 | 50.6 | 87522.6  |
| 65 | 69115.9 | 839.3  | 15215.2 | 2211.3 | 3617.5 | 1050.7 | 382.2  | 22.6 | 5588.1 | 63.4 | 98106.1  |
| 66 | 80521.0 | 1383.4 | 12851.0 | 2079.8 | 3727.1 | 1042.7 | 572.8  | 35.3 | 4530.5 | 64.1 | 106807.6 |
| 67 | 70040.0 | 1343.1 | 10889.0 | 1703.9 | 2349.0 | 671.2  | 759.9  | 26.3 | 4683.7 | 58.0 | 92524.1  |
| 68 | 69772.1 | 1569.9 | 11236.6 | 3344.8 | 1708.2 | 994.1  | 377.6  | 33.6 | 4561.5 | 11.0 | 93609.3  |
| 69 | 61180.7 | 1892.6 | 9913.5  | 1622.5 | 1858.4 | 606.4  | 266.2  | 17.9 | 3971.1 | 49.5 | 81378.7  |
| 70 | 57593.5 | 1055.8 | 11219.7 | 1405.7 | 1367.1 | 894.9  | 1130.7 | 58.1 | 2979.6 | 50.6 | 77755.5  |
| 71 | 72054.3 | 1143.0 | 12659.6 | 1518.5 | 3923.1 | 842.9  | 415.4  | 55.4 | 5024.2 | 51.0 | 97687.4  |
| 72 | 78277.6 | 1262.9 | 9351.3  | 1645.3 | 2717.8 | 466.5  | 250.6  | 15.9 | 4729.7 | 55.4 | 98773.1  |
| 73 | 84391.2 | 1220.7 | 12099.9 | 1377.5 | 3337.8 | 553.5  | 581.7  | 19.2 | 5933.4 | 63.9 | 109578.9 |
| 74 | 87510.9 | 1945.9 | 15505.0 | 1191.2 | 2588.8 | 588.0  | 631.7  | 23.0 | 4191.4 | 69.5 | 114245.5 |
| 75 | 58550.2 | 747.6  | 9421.2  | 1707.0 | 1667.5 | 748.7  | 460.3  | 35.9 | 2897.7 | 54.8 | 76290.9  |
| 76 | 60804.5 | 734.4  | 9760.8  | 1047.9 | 2249.4 | 499.0  | 391.3  | 15.0 | 3924.7 | 46.7 | 79473.6  |
| 77 | 76632.8 | 1776.7 | 11219.4 | 2124.2 | 3301.7 | 873.5  | 703.3  | 25.8 | 3998.6 | 54.1 | 100710.2 |
| 78 | 68269.5 | 968.9  | 9154.7  | 2711.2 | 3407.6 | 737.3  | 637.2  | 21.6 | 4071.0 | 46.9 | 90026.1  |
| 79 | 84089.4 | 869.9  | 11835.1 | 2794.7 | 3169.3 | 857.6  | 632.8  | 17.1 | 5603.4 | 63.4 | 109932.6 |
| 80 | 79459.2 | 1049.8 | 11583.8 | 1861.1 | 2923.5 | 738.4  | 345.7  | 17.4 | 4905.5 | 64.9 | 102949.4 |
| 81 | 77571.0 | 1433.3 | 14275.4 | 883.6  | 2788.5 | 794.7  | 168.4  | 9.5  | 4310.5 | 54.7 | 102289.6 |
| 82 | 86006.9 | 1179.7 | 13696.3 | 2527.2 | 4210.8 | 839.6  | 84.6   | 18.9 | 4872.7 | 74.4 | 113511.0 |

|     |         |        |         |        |        |        |        |      |        |      |          |
|-----|---------|--------|---------|--------|--------|--------|--------|------|--------|------|----------|
| 83  | 73547.1 | 1781.6 | 13197.4 | 3706.9 | 2603.5 | 1091.2 | 205.2  | 10.5 | 4807.8 | 65.1 | 101016.3 |
| 84  | 59287.4 | 1511.3 | 7379.2  | 1904.4 | 1305.3 | 452.7  | 986.8  | 21.8 | 3447.5 | 45.8 | 76342.3  |
| 85  | 74734.6 | 1423.6 | 11032.8 | 2710.0 | 2350.1 | 845.5  | 213.0  | 20.0 | 4227.8 | 55.6 | 97612.9  |
| 86  | 66653.1 | 1493.2 | 12194.7 | 1287.5 | 2093.5 | 718.9  | 864.8  | 20.8 | 4131.9 | 53.0 | 89511.3  |
| 87  | 60303.9 | 1305.4 | 9922.1  | 1157.2 | 2570.5 | 506.6  | 310.9  | 17.3 | 2688.3 | 51.0 | 78833.0  |
| 88  | 70741.3 | 1416.5 | 11418.7 | 1459.9 | 2302.9 | 570.1  | 345.0  | 24.5 | 4771.6 | 54.1 | 93104.6  |
| 89  | 68722.5 | 1155.9 | 14481.1 | 3211.5 | 2810.8 | 1102.4 | 522.2  | 13.1 | 4214.5 | 53.0 | 96287.0  |
| 90  | 61719.5 | 1260.5 | 8836.3  | 1105.8 | 1763.3 | 501.4  | 326.0  | 15.8 | 4294.9 | 52.7 | 79876.2  |
| 91  | 81395.9 | 1413.4 | 16398.7 | 1537.7 | 1813.9 | 800.1  | 340.9  | 13.0 | 6020.0 | 68.3 | 109802.0 |
| 92  | 64379.6 | 1407.3 | 10237.8 | 1210.6 | 2183.1 | 479.0  | 488.9  | 11.5 | 3918.8 | 53.8 | 84370.3  |
| 93  | 92661.5 | 1820.0 | 11707.6 | 2208.8 | 2714.9 | 694.2  | 1334.9 | 35.0 | 6997.5 | 58.9 | 120233.4 |
| 94  | 64795.5 | 1226.0 | 13263.5 | 2267.4 | 2836.8 | 820.4  | 411.1  | 27.5 | 3690.1 | 46.3 | 89384.6  |
| 95  | 71365.7 | 1170.2 | 14094.4 | 1894.1 | 3235.0 | 718.7  | 778.7  | 26.2 | 4792.0 | 49.1 | 98124.0  |
| 96  | 84823.2 | 2328.6 | 15664.4 | 2499.6 | 4519.6 | 933.3  | 403.5  | 31.0 | 4068.9 | 72.7 | 115344.7 |
| 97  | 76744.9 | 1506.0 | 17754.4 | 1505.5 | 2681.4 | 1151.7 | 581.5  | 57.9 | 4416.5 | 50.6 | 106450.3 |
| 98  | 66446.0 | 1599.5 | 16251.5 | 969.1  | 3459.4 | 739.4  | 665.6  | 38.3 | 3913.8 | 50.4 | 94133.0  |
| 99  | 62258.5 | 1089.2 | 12564.6 | 798.4  | 1735.0 | 625.3  | 382.1  | 12.7 | 3667.3 | 47.2 | 83180.3  |
| 100 | 77493.6 | 1959.1 | 13541.1 | 2636.9 | 2394.4 | 711.7  | 501.8  | 35.0 | 5107.9 | 54.2 | 104435.9 |
| 101 | 60576.3 | 979.4  | 10832.9 | 1167.9 | 2213.6 | 474.8  | 379.9  | 14.5 | 3924.1 | 48.7 | 80612.2  |
| 102 | 60684.6 | 1339.3 | 11639.0 | 1378.7 | 3681.6 | 595.6  | 184.0  | 11.2 | 3715.6 | 43.4 | 83273.0  |
| 103 | 59284.9 | 887.1  | 10073.5 | 1708.9 | 1393.4 | 551.0  | 278.4  | 18.9 | 3190.0 | 56.8 | 77442.9  |
| 104 | 75504.8 | 1343.4 | 10831.7 | 1593.9 | 1872.7 | 648.7  | 144.4  | 22.5 | 5305.1 | 49.7 | 97316.8  |
| 105 | 61010.5 | 1422.0 | 10490.2 | 1484.6 | 1428.1 | 657.6  | 1301.6 | 45.2 | 3969.5 | 48.9 | 81858.1  |
| 106 | 58857.9 | 1182.3 | 10725.1 | 1740.1 | 4235.6 | 748.7  | 141.8  | 19.4 | 4439.1 | 44.6 | 82134.6  |
| 107 | 68179.1 | 1034.7 | 10681.3 | 2236.2 | 2114.3 | 637.3  | 392.1  | 26.3 | 4042.0 | 50.6 | 89393.9  |
| 108 | 70469.0 | 1240.3 | 11581.9 | 1964.4 | 2470.2 | 630.6  | 446.1  | 24.5 | 5455.4 | 61.4 | 94343.9  |
| 109 | 73731.3 | 1026.9 | 11475.0 | 2262.5 | 3285.8 | 619.2  | 682.2  | 24.6 | 4022.9 | 60.1 | 97190.6  |
| 110 | 73068.4 | 1417.0 | 14087.5 | 4104.6 | 2599.6 | 1491.5 | 202.5  | 23.4 | 4312.8 | 52.1 | 101359.3 |
| 111 | 55511.2 | 1031.8 | 8398.2  | 692.3  | 1422.0 | 333.9  | 855.1  | 17.2 | 2434.9 | 41.2 | 70737.9  |
| 113 | 67083.9 | 1014.3 | 11163.5 | 1153.8 | 3051.0 | 475.6  | 966.0  | 14.1 | 2612.7 | 51.6 | 87586.3  |
| 115 | 61892.9 | 1499.1 | 11753.9 | 1007.5 | 2116.8 | 441.1  | 542.7  | 16.5 | 3328.8 | 44.7 | 82643.9  |

|     |         |        |         |        |        |       |         |       |        |      |          |
|-----|---------|--------|---------|--------|--------|-------|---------|-------|--------|------|----------|
| 118 | 73354.6 | 1027.4 | 17466.5 | 2081.1 | 3353.3 | 758.0 | 543.3   | 27.2  | 4206.4 | 60.6 | 102878.4 |
| 119 | 44503.4 | 829.1  | 16649.4 | 360.8  | 609.4  | 699.3 | 276.0   | 13.7  | 3353.6 | 39.4 | 67334.2  |
| 132 | 54920.7 | 932.0  | 10774.3 | 1100.7 | 1876.4 | 457.3 | 601.3   | 12.3  | 3185.5 | 44.8 | 73905.3  |
| 133 | 53668.0 | 1076.8 | 20469.2 | 1077.9 | 2331.0 | 739.4 | 498.9   | 22.8  | 3699.0 | 40.9 | 83623.9  |
| 134 | 55327.4 | 1235.6 | 15944.3 | 1924.9 | 2060.5 | 595.1 | 988.5   | 17.9  | 3921.3 | 10.9 | 82026.3  |
| 135 | 51739.4 | 1506.7 | 21146.0 | 801.2  | 1295.0 | 642.5 | 507.3   | 18.3  | 4398.4 | 4.8  | 82059.7  |
| 136 | 51378.7 | 756.6  | 9001.0  | 1163.7 | 1846.2 | 317.3 | 710.5   | 10.8  | 2309.4 | 45.4 | 67539.5  |
| 137 | 61581.8 | 1397.7 | 8133.7  | 761.9  | 1770.5 | 333.3 | 211.6   | 13.7  | 3212.5 | 51.9 | 77468.6  |
| 138 | 63429.5 | 952.5  | 9975.4  | 1846.9 | 3129.3 | 433.1 | 381.8   | 9.0   | 4639.5 | 56.4 | 84853.3  |
| 139 | 33396.1 | 1139.3 | 8202.4  | 392.9  | 259.3  | 469.7 | 362.0   | 21.3  | 1523.9 | 42.7 | 45809.6  |
| 140 | 54047.4 | 1368.8 | 17465.0 | 1002.0 | 2216.0 | 470.6 | 463.2   | 11.8  | 4065.9 | 52.2 | 81162.9  |
| 141 | 62751.8 | 1235.4 | 16445.5 | 1031.1 | 1983.9 | 525.9 | 1381.8  | 23.5  | 4465.2 | 48.8 | 89892.9  |
| 142 | 66778.9 | 1530.0 | 15649.9 | 1771.2 | 1038.5 | 858.8 | 277.7   | 11.2  | 5151.0 | 8.4  | 93075.6  |
| 143 | 51564.2 | 1058.9 | 11426.2 | 299.6  | 1603.1 | 280.0 | 566.7   | 11.1  | 2591.7 | 38.2 | 69439.8  |
| 144 | 60673.7 | 918.0  | 12588.8 | 1071.0 | 1792.5 | 526.7 | 394.8   | 17.0  | 3324.9 | 43.5 | 81350.9  |
| 145 | 57070.1 | 629.3  | 18749.8 | 1651.8 | 2107.2 | 763.6 | 228.9   | 18.7  | 3885.0 | 47.6 | 85152.1  |
| 146 | 78618.8 | 1722.3 | 11402.7 | 662.0  | 2309.0 | 408.6 | 10506.7 | 163.2 | 4020.7 | 63.2 | 109877.2 |
| 147 | 50782.1 | 1087.3 | 19843.6 | 1133.1 | 1805.4 | 618.0 | 420.8   | 18.7  | 4697.9 | 49.4 | 80456.3  |
| 148 | 57142.9 | 1512.7 | 15421.6 | 2159.8 | 839.8  | 681.4 | 299.7   | 24.8  | 4090.5 | 54.8 | 82228.0  |
| 149 | 64761.5 | 1531.1 | 14528.0 | 1726.9 | 2231.9 | 647.4 | 559.5   | 16.7  | 4071.7 | 53.6 | 90128.3  |
| 150 | 71943.4 | 1530.2 | 11701.1 | 1274.7 | 2129.1 | 442.5 | 763.9   | 15.4  | 4392.6 | 7.3  | 94200.3  |
| 151 | 56153.8 | 1095.2 | 14486.0 | 1359.7 | 1408.4 | 582.1 | 528.3   | 19.1  | 3226.9 | 48.5 | 78907.9  |
| 152 | 62393.1 | 1290.4 | 19341.3 | 1130.5 | 2566.4 | 595.1 | 119.0   | 12.8  | 3712.1 | 43.7 | 91204.3  |
| 153 | 57789.8 | 1114.5 | 8728.0  | 965.7  | 1901.9 | 387.4 | 327.0   | 10.3  | 2978.5 | 47.1 | 74249.9  |
| 154 | 50632.4 | 1005.0 | 21667.3 | 871.6  | 2423.0 | 576.8 | 440.8   | 16.8  | 3367.3 | 38.2 | 81039.1  |
| 155 | 49167.3 | 903.2  | 18125.0 | 964.6  | 1674.6 | 495.2 | 445.7   | 12.9  | 4283.9 | 44.6 | 76117.0  |
| 156 | 50592.8 | 1186.4 | 16879.9 | 988.3  | 2257.2 | 376.4 | 488.1   | 8.2   | 2750.6 | 44.8 | 75572.6  |
| 157 | 63071.6 | 1365.8 | 13036.0 | 1575.8 | 3380.7 | 581.6 | 1590.4  | 32.0  | 3456.8 | 51.7 | 88142.3  |
| 158 | 65880.3 | 1322.3 | 16325.2 | 1709.7 | 2050.1 | 625.4 | 352.4   | 16.6  | 4409.8 | 54.8 | 92746.4  |
| 159 | 54998.8 | 1021.3 | 15306.2 | 857.3  | 1719.3 | 427.9 | 152.5   | 11.8  | 3995.3 | 49.0 | 78539.4  |
| 160 | 53916.7 | 1179.4 | 11824.4 | 715.1  | 1672.0 | 504.8 | 343.5   | 18.6  | 3131.7 | 53.2 | 73359.2  |

|     |         |        |         |        |        |        |        |      |        |      |          |
|-----|---------|--------|---------|--------|--------|--------|--------|------|--------|------|----------|
| 161 | 70227.6 | 921.3  | 12154.1 | 1067.2 | 1353.9 | 454.4  | 246.7  | 11.2 | 4108.4 | 54.6 | 90599.5  |
| 162 | 52233.4 | 882.6  | 12987.4 | 1106.5 | 1358.6 | 435.2  | 259.2  | 9.3  | 3710.9 | 43.7 | 73026.7  |
| 163 | 70237.0 | 920.6  | 24865.9 | 1655.8 | 2739.2 | 628.1  | 364.7  | 12.0 | 4115.3 | 49.3 | 105587.9 |
| 164 | 66832.6 | 1210.7 | 23414.6 | 1565.8 | 2738.1 | 683.3  | 369.1  | 11.6 | 4056.8 | 49.2 | 100931.9 |
| 165 | 56443.9 | 940.7  | 16715.7 | 1988.3 | 1817.2 | 654.2  | 751.6  | 11.6 | 3713.7 | 45.1 | 83082.0  |
| 166 | 48178.6 | 657.4  | 15127.0 | 3156.3 | 1275.5 | 1013.7 | 163.9  | 12.3 | 3696.7 | 11.8 | 73293.1  |
| 167 | 65327.1 | 1236.0 | 19840.3 | 2027.3 | 2968.4 | 888.1  | 406.5  | 19.1 | 4024.7 | 44.5 | 96782.1  |
| 168 | 50141.3 | 1087.1 | 9999.6  | 1408.2 | 1087.3 | 499.8  | 411.8  | 13.5 | 3538.6 | 35.7 | 68223.0  |
| 169 | 52479.4 | 1659.1 | 19218.5 | 1050.6 | 2213.0 | 655.5  | 160.2  | 7.2  | 3489.1 | 48.9 | 80981.5  |
| 170 | 58959.0 | 1236.1 | 15396.2 | 1303.9 | 2238.6 | 581.4  | 226.3  | 7.5  | 3751.0 | 49.7 | 83749.8  |
| 171 | 53343.0 | 1407.6 | 17860.5 | 1196.9 | 1357.0 | 678.9  | 248.9  | 12.1 | 4785.2 | 49.0 | 80939.1  |
| 172 | 55368.6 | 1094.3 | 12786.9 | 1449.7 | 2120.1 | 492.5  | 317.3  | 9.0  | 3404.7 | 4.9  | 77047.9  |
| 173 | 62116.6 | 1450.5 | 17747.0 | 1294.6 | 1640.7 | 580.8  | 301.8  | 13.9 | 3965.4 | 53.9 | 89165.3  |
| 174 | 39681.0 | 967.1  | 12679.1 | 964.8  | 808.9  | 435.8  | 488.6  | 10.6 | 2172.1 | 42.6 | 58250.8  |
| 175 | 58905.3 | 997.0  | 9750.5  | 1159.7 | 1671.2 | 412.5  | 208.0  | 9.1  | 4608.9 | 46.5 | 77768.5  |
| 176 | 57347.5 | 1520.0 | 12122.5 | 2058.1 | 3418.9 | 683.1  | 1268.4 | 18.8 | 4160.3 | 53.1 | 82650.8  |
| 177 | 48160.3 | 1164.7 | 11784.3 | 1213.2 | 1308.5 | 443.2  | 552.0  | 9.4  | 3973.3 | 4.0  | 68612.9  |
| 178 | 47888.7 | 991.5  | 8941.1  | 1485.7 | 1945.5 | 390.6  | 921.5  | 21.7 | 4049.4 | 5.3  | 66641.0  |
| 179 | 67312.7 | 1481.6 | 8183.1  | 2925.3 | 3228.0 | 422.0  | 1416.9 | 11.2 | 4645.3 | 9.3  | 89635.5  |
| 180 | 63418.7 | 1274.0 | 12893.4 | 1619.3 | 1285.9 | 910.3  | 307.9  | 14.3 | 5783.1 | 9.8  | 87516.7  |
| 181 | 63923.8 | 940.9  | 20323.1 | 2007.7 | 1606.2 | 769.8  | 449.7  | 31.7 | 4540.2 | 7.0  | 94600.2  |
| 182 | 53251.7 | 964.0  | 12330.9 | 1122.8 | 1829.2 | 542.2  | 188.4  | 15.4 | 2900.1 | 62.4 | 73207.3  |
| 183 | 56935.5 | 1099.4 | 16936.7 | 907.6  | 2088.0 | 470.8  | 290.4  | 8.5  | 3957.7 | 57.8 | 82752.3  |
| 184 | 62636.6 | 1250.3 | 10373.0 | 1130.3 | 1644.8 | 479.8  | 613.7  | 11.3 | 2761.0 | 56.7 | 80957.4  |
| 185 | 52038.8 | 1348.0 | 18121.4 | 2081.5 | 2867.6 | 815.9  | 1494.7 | 10.3 | 4218.0 | 3.5  | 82999.7  |
| 186 | 39872.0 | 692.7  | 15974.3 | 759.2  | 1442.2 | 762.3  | 280.0  | 17.7 | 2765.5 | 33.9 | 62599.7  |
| 187 | 48290.4 | 944.8  | 14447.1 | 1258.9 | 1789.2 | 611.1  | 403.3  | 10.1 | 2818.2 | 4.9  | 70578.1  |
| 188 | 63460.7 | 1206.6 | 14244.5 | 683.7  | 2600.2 | 482.0  | 624.7  | 12.0 | 4246.3 | 59.0 | 87619.7  |
| 189 | 58932.8 | 1114.5 | 22769.6 | 1258.6 | 1553.5 | 790.2  | 255.1  | 16.5 | 4308.3 | 47.4 | 91046.6  |
| 190 | 64564.7 | 1259.8 | 15053.2 | 1097.1 | 2430.3 | 476.9  | 303.6  | 11.1 | 4441.7 | 59.0 | 89697.6  |
| 191 | 48197.4 | 1139.0 | 12452.1 | 957.1  | 1167.4 | 475.2  | 515.7  | 9.3  | 2626.1 | 51.8 | 67591.2  |

|     |          |        |         |        |        |        |        |      |        |      |          |
|-----|----------|--------|---------|--------|--------|--------|--------|------|--------|------|----------|
| 192 | 45610.4  | 809.4  | 12929.3 | 1025.5 | 1163.7 | 589.7  | 283.4  | 13.4 | 3647.9 | 50.4 | 66123.0  |
| 193 | 50896.3  | 1066.8 | 10274.6 | 640.4  | 3312.7 | 446.7  | 749.0  | 9.9  | 3236.0 | 48.1 | 70680.4  |
| 194 | 44513.2  | 607.4  | 16814.1 | 2834.6 | 1135.4 | 1176.2 | 280.1  | 23.5 | 2219.8 | 47.4 | 69651.8  |
| 195 | 84717.1  | 773.3  | 22369.5 | 3162.7 | 3315.9 | 1076.2 | 331.4  | 19.4 | 5105.7 | 70.1 | 120941.3 |
| 196 | 59304.9  | 1316.6 | 20300.1 | 2827.5 | 1974.1 | 895.6  | 379.9  | 21.3 | 4954.4 | 53.3 | 92027.7  |
| 197 | 58967.6  | 1030.6 | 9657.6  | 1667.7 | 2575.4 | 556.0  | 181.2  | 12.4 | 3726.5 | 47.6 | 78422.5  |
| 198 | 62924.0  | 1299.1 | 15472.8 | 1395.5 | 3948.1 | 583.2  | 224.5  | 11.3 | 4040.3 | 51.5 | 89950.2  |
| 199 | 64395.3  | 1326.8 | 14057.0 | 1319.1 | 3064.9 | 533.6  | 662.2  | 8.0  | 5212.5 | 56.7 | 90636.1  |
| 200 | 84170.7  | 874.6  | 20422.4 | 2296.9 | 3871.8 | 843.9  | 586.8  | 16.8 | 6248.2 | 69.0 | 119401.1 |
| 201 | 60235.9  | 1074.4 | 14554.0 | 973.8  | 1417.9 | 424.9  | 579.7  | 8.9  | 3320.4 | 52.3 | 82642.0  |
| 202 | 69387.8  | 1360.8 | 15327.4 | 971.0  | 1306.1 | 608.7  | 4614.4 | 92.6 | 4167.8 | 58.5 | 97895.1  |
| 203 | 52948.5  | 1003.7 | 10034.3 | 2499.8 | 2077.4 | 723.2  | 698.9  | 27.9 | 3159.5 | 38.3 | 73211.4  |
| 204 | 65587.2  | 1522.4 | 12685.9 | 1505.8 | 1950.2 | 695.2  | 669.9  | 15.1 | 3606.5 | 55.6 | 88293.9  |
| 205 | 72144.7  | 1303.7 | 15695.2 | 1830.7 | 4722.1 | 1042.3 | 275.8  | 27.7 | 4442.0 | 56.6 | 101540.8 |
| 206 | 70179.8  | 1697.3 | 14665.2 | 2021.8 | 2398.1 | 1015.8 | 857.9  | 85.3 | 3526.9 | 57.1 | 96505.1  |
| 207 | 56350.5  | 1248.3 | 11957.0 | 902.0  | 1771.9 | 703.6  | 454.1  | 19.2 | 3533.3 | 44.6 | 76984.5  |
| 208 | 86987.4  | 1713.2 | 17003.2 | 2472.3 | 1846.1 | 1097.4 | 125.7  | 34.4 | 5565.0 | 73.1 | 116917.8 |
| 209 | 70009.0  | 1381.5 | 12192.1 | 1746.9 | 2906.4 | 822.0  | 447.1  | 28.1 | 4037.4 | 58.8 | 93629.3  |
| 210 | 68310.8  | 1339.9 | 10573.0 | 1570.0 | 1602.0 | 601.7  | 151.7  | 21.5 | 4180.9 | 56.5 | 88408.0  |
| 211 | 87215.0  | 1525.4 | 13908.1 | 2858.0 | 3831.7 | 750.7  | 778.0  | 21.8 | 4671.1 | 76.2 | 115635.9 |
| 212 | 83002.6  | 1674.1 | 14152.5 | 1262.2 | 2197.6 | 711.8  | 847.5  | 30.8 | 4007.5 | 71.2 | 107957.7 |
| 213 | 77374.2  | 1544.7 | 15376.8 | 1556.7 | 2518.0 | 947.9  | 460.9  | 26.6 | 3802.7 | 58.4 | 103666.9 |
| 214 | 70722.9  | 2068.2 | 15139.8 | 2651.2 | 2373.7 | 1263.9 | 197.4  | 34.7 | 5801.4 | 56.6 | 100309.8 |
| 215 | 83454.1  | 1443.3 | 15090.5 | 3833.4 | 2248.0 | 721.9  | 1021.5 | 55.7 | 6592.2 | 74.2 | 114534.8 |
| 216 | 74648.9  | 1655.2 | 12062.6 | 2299.5 | 3137.2 | 901.9  | 438.0  | 33.5 | 4715.4 | 54.3 | 99946.6  |
| 217 | 71776.7  | 1500.8 | 10477.3 | 2371.8 | 2713.7 | 711.7  | 704.8  | 25.1 | 4644.4 | 66.1 | 94992.3  |
| 218 | 67521.7  | 1584.0 | 9891.2  | 2406.9 | 2135.6 | 557.7  | 86.5   | 18.9 | 3320.9 | 57.1 | 87580.5  |
| 219 | 109660.3 | 1702.2 | 15303.1 | 2727.6 | 3071.0 | 856.4  | 440.8  | 24.6 | 6530.4 | 95.9 | 140412.5 |
| 222 | 80178.4  | 1638.4 | 13485.1 | 2741.9 | 2924.7 | 921.0  | 500.8  | 22.8 | 4657.9 | 65.6 | 107136.5 |
| 223 | 65781.0  | 1218.4 | 8966.7  | 1224.4 | 1680.2 | 456.1  | 164.0  | 16.8 | 4128.1 | 50.0 | 83685.9  |
| 224 | 60900.0  | 1213.2 | 12514.5 | 1339.4 | 1756.0 | 621.9  | 200.0  | 17.1 | 3569.4 | 50.5 | 82181.8  |

|     |          |        |         |        |        |        |        |       |        |      |          |
|-----|----------|--------|---------|--------|--------|--------|--------|-------|--------|------|----------|
| 229 | 73895.7  | 1550.6 | 13302.3 | 2016.0 | 4147.0 | 706.6  | 439.7  | 15.8  | 4963.2 | 54.6 | 101091.5 |
| 231 | 61141.5  | 988.4  | 11488.6 | 2789.3 | 1903.2 | 712.8  | 925.2  | 30.3  | 3783.4 | 59.1 | 83821.9  |
| 232 | 112096.5 | 1855.9 | 14564.3 | 1836.9 | 4636.0 | 559.0  | 685.9  | 9.8   | 7623.4 | 87.8 | 143955.4 |
| 233 | 73794.0  | 1089.5 | 14127.1 | 1814.7 | 2907.1 | 921.3  | 610.8  | 21.4  | 4551.7 | 54.5 | 99892.1  |
| 234 | 76221.3  | 1055.7 | 12991.3 | 2444.8 | 2031.9 | 770.8  | 418.6  | 18.1  | 4565.4 | 54.9 | 100572.8 |
| 235 | 67697.7  | 1933.7 | 8516.3  | 770.5  | 3676.2 | 380.4  | 430.0  | 19.5  | 3246.5 | 49.8 | 86720.7  |
| 236 | 62237.1  | 1061.9 | 10208.3 | 2315.7 | 1981.6 | 614.1  | 368.1  | 21.4  | 4230.1 | 48.2 | 83086.3  |
| 237 | 69699.2  | 1225.2 | 13816.0 | 2245.3 | 2242.5 | 824.0  | 635.4  | 22.6  | 4305.6 | 57.7 | 95073.6  |
| 238 | 85739.5  | 1594.8 | 14620.2 | 3088.0 | 4102.4 | 937.8  | 714.8  | 20.9  | 5410.3 | 80.2 | 116308.8 |
| 239 | 91365.9  | 1480.2 | 15939.0 | 3852.9 | 2516.0 | 973.6  | 575.6  | 11.8  | 6940.0 | 67.7 | 123722.6 |
| 240 | 76615.9  | 1594.1 | 13146.4 | 1977.9 | 2683.8 | 660.0  | 601.3  | 16.8  | 4576.4 | 64.9 | 101937.7 |
| 241 | 91839.9  | 1473.2 | 19020.7 | 1966.5 | 3433.2 | 1062.5 | 1023.0 | 23.6  | 5845.1 | 67.5 | 125755.1 |
| 242 | 82172.7  | 1246.6 | 15135.4 | 3293.1 | 3197.0 | 1060.2 | 670.0  | 22.2  | 5806.8 | 58.2 | 112662.1 |
| 243 | 67303.8  | 1279.5 | 12171.6 | 2148.0 | 2141.5 | 803.8  | 698.6  | 36.9  | 4087.9 | 58.5 | 90730.1  |
| 244 | 58715.9  | 1259.5 | 12796.7 | 1488.0 | 2724.9 | 756.7  | 490.3  | 19.5  | 3671.7 | 56.5 | 81979.7  |
| 245 | 68366.6  | 1389.6 | 10187.1 | 930.4  | 1384.4 | 485.4  | 3154.2 | 65.7  | 4189.5 | 60.4 | 90213.3  |
| 246 | 71594.5  | 1102.8 | 14410.4 | 2961.4 | 3717.6 | 1322.7 | 721.7  | 30.8  | 4422.3 | 64.2 | 100348.3 |
| 247 | 56115.6  | 1128.6 | 7575.5  | 1008.5 | 991.2  | 475.3  | 414.6  | 15.4  | 2872.6 | 53.1 | 70650.4  |
| 248 | 72221.2  | 1401.2 | 14080.2 | 2515.8 | 2123.4 | 942.5  | 487.9  | 20.9  | 5385.5 | 64.7 | 99243.1  |
| 249 | 71991.2  | 1354.0 | 12853.6 | 2866.2 | 3301.1 | 1247.9 | 2626.3 | 204.9 | 4006.7 | 70.4 | 100522.2 |
| 250 | 66481.2  | 1160.0 | 9759.6  | 2222.6 | 2219.8 | 818.4  | 388.8  | 19.0  | 3567.4 | 52.9 | 86689.8  |
| 251 | 89258.5  | 1628.0 | 13110.8 | 3357.8 | 2808.7 | 1030.3 | 554.5  | 31.0  | 4953.5 | 75.8 | 116808.8 |
| 252 | 77400.7  | 1535.6 | 11735.6 | 3169.6 | 2051.4 | 951.8  | 838.1  | 30.0  | 3771.2 | 58.3 | 101542.3 |
| 253 | 76551.6  | 2006.4 | 13612.8 | 1873.6 | 2461.2 | 1020.5 | 652.7  | 23.6  | 3802.8 | 62.6 | 102068.0 |
| 254 | 54581.1  | 813.9  | 9461.8  | 1042.3 | 1771.6 | 754.1  | 397.7  | 10.5  | 2458.4 | 46.4 | 71337.9  |
| 255 | 75269.2  | 1346.5 | 11746.8 | 1725.1 | 3739.6 | 768.0  | 602.9  | 16.9  | 4255.7 | 74.7 | 99545.4  |
| 256 | 75907.0  | 1093.5 | 14506.2 | 1563.2 | 1569.0 | 718.1  | 4364.7 | 150.2 | 3392.8 | 65.8 | 103330.4 |
| 257 | 54204.2  | 512.1  | 9126.0  | 1240.8 | 2073.0 | 465.0  | 616.6  | 11.2  | 2483.6 | 50.7 | 70783.2  |
| 258 | 71356.3  | 1452.6 | 13932.6 | 1068.5 | 2699.2 | 877.9  | 2785.4 | 146.6 | 3382.6 | 59.2 | 97760.9  |
| 259 | 81517.2  | 1316.0 | 12839.2 | 1821.7 | 2923.4 | 798.3  | 2279.5 | 110.0 | 3807.8 | 71.2 | 107484.2 |
| 260 | 74880.1  | 1618.9 | 12944.4 | 1469.3 | 4025.8 | 825.4  | 538.2  | 12.7  | 4219.9 | 55.3 | 100590.0 |



|     |         |        |         |        |        |        |        |       |        |      |          |
|-----|---------|--------|---------|--------|--------|--------|--------|-------|--------|------|----------|
| 261 | 69144.6 | 1197.0 | 11253.4 | 1842.2 | 1990.0 | 756.7  | 412.1  | 35.0  | 4085.3 | 62.4 | 90778.7  |
| 262 | 85791.3 | 1232.7 | 9440.4  | 3217.5 | 2023.7 | 530.1  | 541.9  | 11.3  | 7306.3 | 67.7 | 110162.9 |
| 263 | 63452.0 | 955.5  | 10622.4 | 2306.7 | 1818.6 | 775.3  | 475.3  | 15.9  | 3854.4 | 56.8 | 84332.7  |
| 264 | 68564.6 | 1106.9 | 16274.3 | 1481.5 | 1778.0 | 1056.7 | 472.9  | 18.0  | 5098.6 | 56.3 | 95907.9  |
| 265 | 54907.2 | 904.4  | 9566.6  | 820.2  | 2197.3 | 525.5  | 296.2  | 21.3  | 3248.6 | 45.1 | 72532.3  |
| 266 | 73008.5 | 1097.8 | 8122.1  | 2465.5 | 2614.1 | 548.6  | 689.3  | 11.9  | 5078.3 | 53.6 | 93689.7  |
| 267 | 74771.3 | 1285.5 | 12939.6 | 2056.5 | 3046.0 | 1073.6 | 554.9  | 19.1  | 4845.4 | 54.2 | 100646.0 |
| 268 | 69663.2 | 1069.6 | 10573.8 | 2789.2 | 2395.5 | 724.1  | 1009.4 | 40.0  | 4713.7 | 64.3 | 93042.9  |
| 269 | 63734.9 | 1496.9 | 11271.1 | 2145.5 | 1791.9 | 823.8  | 390.1  | 19.5  | 4635.7 | 56.3 | 86365.7  |
| 270 | 73561.3 | 1275.3 | 12091.2 | 1537.0 | 1842.6 | 664.3  | 523.4  | 30.8  | 4098.1 | 63.0 | 95687.1  |
| 271 | 79547.4 | 1037.0 | 11934.6 | 1938.7 | 2571.0 | 833.7  | 718.3  | 19.5  | 3974.1 | 60.6 | 102634.9 |
| 272 | 58085.2 | 895.1  | 7931.4  | 1444.7 | 2028.0 | 536.5  | 310.8  | 20.3  | 2659.0 | 44.5 | 73955.6  |
| 273 | 76966.3 | 1402.2 | 10913.9 | 2357.1 | 2600.7 | 752.7  | 803.7  | 21.6  | 3478.3 | 65.2 | 99361.6  |
| 274 | 62223.5 | 1151.6 | 10784.2 | 1815.7 | 2800.5 | 693.8  | 578.7  | 22.1  | 2892.5 | 53.2 | 83015.8  |
| 275 | 85619.9 | 1180.3 | 14753.0 | 1983.6 | 2381.5 | 989.5  | 660.0  | 24.6  | 4289.2 | 57.5 | 111939.0 |
| 276 | 88431.4 | 1067.4 | 15560.1 | 3284.9 | 3123.8 | 1210.0 | 997.1  | 55.7  | 5542.9 | 68.3 | 119341.7 |
| 277 | 67322.3 | 980.4  | 9959.5  | 2051.6 | 1490.0 | 680.8  | 148.1  | 17.4  | 4419.0 | 60.5 | 87129.4  |
| 278 | 75998.2 | 920.1  | 12308.1 | 2531.7 | 2515.0 | 828.8  | 153.7  | 28.9  | 4995.3 | 68.9 | 100348.8 |
| 279 | 68284.6 | 1174.9 | 14892.0 | 2318.9 | 1962.0 | 1018.2 | 121.9  | 28.4  | 4206.3 | 66.8 | 94073.8  |
| 280 | 70793.5 | 1165.0 | 12092.3 | 1868.2 | 2721.0 | 588.7  | 127.3  | 17.1  | 3932.6 | 55.4 | 93361.1  |
| 281 | 90034.6 | 1502.7 | 16231.1 | 5530.4 | 2030.6 | 1366.2 | 401.0  | 32.2  | 5302.3 | 69.0 | 122500.3 |
| 282 | 80861.4 | 1290.2 | 15368.2 | 2900.1 | 2032.2 | 1143.5 | 502.8  | 43.3  | 4634.0 | 61.1 | 108836.8 |
| 283 | 74445.9 | 1418.7 | 15137.1 | 968.2  | 2838.2 | 986.6  | 126.6  | 26.1  | 4091.3 | 57.0 | 100095.9 |
| 284 | 58270.0 | 958.7  | 9619.2  | 1148.0 | 1868.6 | 438.4  | 309.9  | 35.0  | 2732.9 | 51.6 | 75432.2  |
| 285 | 69376.8 | 1020.3 | 11750.7 | 1629.2 | 3317.0 | 738.7  | 611.4  | 24.6  | 3511.7 | 59.3 | 92039.8  |
| 286 | 67100.4 | 1228.4 | 8059.4  | 3558.3 | 3141.6 | 542.4  | 131.2  | 30.3  | 3785.8 | 62.7 | 87640.6  |
| 287 | 78584.9 | 962.9  | 12657.9 | 1505.2 | 1609.4 | 702.8  | 371.4  | 20.7  | 4830.0 | 51.8 | 101297.0 |
| 288 | 62407.8 | 678.9  | 12109.7 | 1864.9 | 1634.8 | 896.9  | 1597.9 | 117.4 | 3280.0 | 53.5 | 84641.7  |
| 289 | 65880.3 | 643.0  | 19419.4 | 2315.2 | 1839.1 | 884.8  | 316.4  | 11.0  | 5138.3 | 58.4 | 96505.9  |
| 290 | 53754.9 | 1055.1 | 11250.3 | 1246.5 | 1987.9 | 413.0  | 524.0  | 10.7  | 3380.0 | 53.6 | 73676.1  |
| 291 | 44041.4 | 796.3  | 21204.8 | 615.0  | 2361.0 | 662.2  | 651.2  | 17.0  | 2139.5 | 37.9 | 72526.4  |

|     |         |        |         |        |        |       |        |      |        |      |          |
|-----|---------|--------|---------|--------|--------|-------|--------|------|--------|------|----------|
| 292 | 44515.8 | 746.7  | 20185.9 | 2061.8 | 2718.6 | 568.5 | 1527.8 | 11.7 | 4984.1 | 38.2 | 77359.0  |
| 293 | 77579.4 | 1268.0 | 19952.2 | 1628.8 | 3318.4 | 752.5 | 671.0  | 25.6 | 4598.7 | 57.0 | 109851.6 |
| 294 | 53117.0 | 835.8  | 13805.6 | 1508.4 | 1953.9 | 763.1 | 450.0  | 17.2 | 3977.2 | 42.7 | 76471.0  |
| 295 | 81882.7 | 1262.7 | 13460.3 | 1656.1 | 2278.7 | 503.4 | 171.7  | 9.9  | 5172.3 | 59.9 | 106457.6 |
| 296 | 47112.4 | 844.8  | 10523.3 | 829.6  | 2798.5 | 392.5 | 743.6  | 22.5 | 2416.8 | 45.1 | 65729.0  |
| 297 | 68257.5 | 998.3  | 11823.1 | 1441.0 | 2100.7 | 515.9 | 515.6  | 13.6 | 3127.7 | 65.2 | 88858.4  |
| 298 | 55569.8 | 782.8  | 20578.0 | 1569.8 | 1342.0 | 809.2 | 621.2  | 50.9 | 4054.7 | 39.5 | 85418.0  |
| 299 | 70926.1 | 1686.8 | 18516.9 | 1554.5 | 2364.6 | 741.4 | 253.8  | 13.5 | 4645.2 | 58.0 | 100760.6 |
| 300 | 38607.5 | 720.0  | 10566.4 | 538.0  | 2128.2 | 273.6 | 319.9  | 7.0  | 2221.1 | 37.8 | 55419.5  |
| 301 | 44358.4 | 891.0  | 14211.1 | 1046.7 | 1153.6 | 656.9 | 694.8  | 26.3 | 2519.8 | 40.6 | 65599.2  |

## Supplementary Table S2.

**Serum lipid level alterations in the Iberian GD and PD cohort using 30% cut-off on absolute lipid levels. A.** Patient groups compared with the control group. Results obtained, when controlling for sex and age at blood collection. Patients' sex coded as 0 (female) or 1 (male). **B.** Association of PD disease severity, therapy and disease duration with lipid level changes. **C.** Association of GD therapy with lipid level changes. **A.-C.:** Results are presented as analyzed by method #1 (see "Quantification of the levels of lipid groups and their species"). Lipid nomenclature as in the text. Effects of the independent variables on the normalized lipid levels (dependent variables) are expressed by the corresponding estimated regression coefficients, with positive (negative, respectively) coefficients meaning that higher values of the independent variables are associated with higher (lower, respectively) values of the lipid levels. All variables were scaled so that their maximum absolute value was equal to 1. \*, \*\* and \*\*\* denote  $P < 0.05$ ,  $P < 0.01$ , and  $P < 0.001$ , respectively.

| Phospholipids                       | PC       | LPC           | PC/LPC   | P-PC     | PE      | LPE      | PE/LPE   | P-PE     | PS           | LPS     | PS/LPS        | PI       | PG       |
|-------------------------------------|----------|---------------|----------|----------|---------|----------|----------|----------|--------------|---------|---------------|----------|----------|
| Between-group analyses              |          |               |          |          |         |          |          |          |              |         |               |          |          |
| A. Patient groups vs. control group |          |               |          |          |         |          |          |          |              |         |               |          |          |
| Intercept                           | 0.531*** | 0.560***      | 0.977*** | 0.431*** | 0.149** | 0.363*** | 0.467*** | 0.391*** | 0.096**      | 0.099** | 1.015***      | 0.464*** | 0.288*** |
| PD (n=100)                          | 0.043**  | -<br>0.115*** | 0.280*** | -0.037   | 0.033   | 0.052*   | 0.006    | 0.088*** | -<br>0.032** | 0.005   | -<br>0.480*** | 0.008    | 0.025    |

|                                                                                                        |                 |                      |                 |         |                |                 |               |               |        |                 |        |                 |                  |
|--------------------------------------------------------------------------------------------------------|-----------------|----------------------|-----------------|---------|----------------|-----------------|---------------|---------------|--------|-----------------|--------|-----------------|------------------|
| <b>GBA-PD (n=15)</b>                                                                                   | 0.024           | -<br><b>0.104***</b> | <b>0.235***</b> | -0.027  | 0.026          | 0.012           | 0.031         | 0.055         | -0.015 | 0.003           | -0.304 | -0.007          | 0.026            |
| <b>GD (n=70)</b>                                                                                       | <b>0.076***</b> | -<br><b>0.064***</b> | <b>0.250***</b> | -0.021  | <b>0.070**</b> | <b>0.088***</b> | 0.029         | <b>0.063*</b> | -0.004 | <b>0.056**</b>  | -0.203 | 0.0268          | <b>0.0697***</b> |
| <b>Sex</b>                                                                                             | 0.011           | 0.001                | 0.006           | 0.020   | 0.029          | 0.018           | 0.039         | 0.029         | 0.016  | 0.0189          | 0.086  | -0.009          | 0.013            |
| <b>Age of Collection</b>                                                                               | 0.017           | 0.0358               | 0.024           | 0.115   | <b>0.169**</b> | 0.081           | <b>0.251*</b> | 0.062         | -0.014 | -0.010          | 0.0364 | 0.087           | 7.20e-05         |
| <b>Within-group analyses</b>                                                                           |                 |                      |                 |         |                |                 |               |               |        |                 |        |                 |                  |
| <b>B. Associations with PD disease severity, medication and disease duration (n = 46; PD patients)</b> |                 |                      |                 |         |                |                 |               |               |        |                 |        |                 |                  |
| <b>Intercept</b>                                                                                       | 0.786***        | 0.669***             | 1.167***        | 0.363*  | 0.383*         | 0.656***        | 0.570         | 0.760***      | 0.0599 | 0.0887          | 0.966* | 1.037***        | 0.565**          |
| <b>Hoehn and Yahr scale</b>                                                                            | -0.039          | -0.052               | 0.043           | -0.149  | 0.056          | -0.0008         | 0.127         | -0.163        | 0.008  | -0.042          | 0.449  | 0.036           | -0.035           |
| <b>Dopamine Agonist</b>                                                                                | <b>-0.118*</b>  | -0.091               | 0.002           | 0.017   | -0.124         | -0.102          | -0.152        | 0.075         | -0.040 | 0.028           | -0.485 | <b>-0.204*</b>  | -0.081           |
| <b>Anti-Parkinsonian</b>                                                                               | -0.024          | -0.009               | -0.022          | -0.088  | -0.071         | 0.0142          | -0.172        | 0.0003        | 0.015  | <b>0.060***</b> | -0.075 | -0.077          | 0.0987           |
| <b>Sex</b>                                                                                             | -0.038          | -0.0005              | -0.106          | 0.023   | -0.038         | -0.025          | -0.068        | -0.027        | 0.021  | 0.002           | 0.178  | <b>-0.106**</b> | -0.014           |
| <b>Age of Collection</b>                                                                               | -0.124          | -0.132               | 0.064           | 0.177   | 0.084          | -0.088          | 0.287         | -0.269        | 0.006  | -0.001          | -0.410 | <b>-0.376*</b>  | -0.222           |
| <b>Disease Duration</b>                                                                                | -0.070          | <b>-0.142*</b>       | 0.304           | -0.141  | -0.030         | -0.146          | 0.298         | -0.167        | 0.0008 | -0.017          | 0.211  | -0.113          | -0.094           |
| <b>C. Associations with GD therapy [(n = 42) vs non-treated (n=27) GD patients]</b>                    |                 |                      |                 |         |                |                 |               |               |        |                 |        |                 |                  |
| <b>Intercept</b>                                                                                       | 0.510***        | 0.383**              | 1.379***        | 0.430** | -0.077         | 0.233**         | 0.187         | 0.358*        | -0.049 | 0.196           | -0.867 | 0.353***        | 0.319***         |
| <b>Imiglucerase (n=12)</b>                                                                             | 0.016           | -0.053               | 0.099           | 0.026   | -0.038         | 0.013           | -0.067        | -0.031        | -0.014 | -0.009          | -0.243 | -0.017          | 0.016            |

|                                      |        |               |                |        |               |                |        |               |        |        |        |        |                 |
|--------------------------------------|--------|---------------|----------------|--------|---------------|----------------|--------|---------------|--------|--------|--------|--------|-----------------|
| <b>Velaglucerase<br/>alfa (n=16)</b> | 0.062  | 0.008         | 0.038          | 0.081  | <b>0.093*</b> | <b>0.135**</b> | -0.036 | 0.014         | -0.005 | 0.031  | -0.137 | 0.031  | 0.028           |
| <b>Eliglustat (n=6)</b>              | 0.091  | -0.010        | 0.105          | 0.115  | 0.051         | 0.034          | 0.032  | 0.125         | -0.018 | -0.074 | 0.058  | 0.100  | <b>0.093***</b> |
| <b>Miglustat (n=8)</b>               | -0.035 | 0.084         | <b>-0.250*</b> | -0.029 | -0.074        | 0.012          | -0.184 | -0.035        | -0.032 | 0.030  | -0.174 | -0.021 | -0.025          |
| <b>Sex</b>                           | 0.039  | <b>0.069*</b> | -0.071         | -0.010 | 0.101         | 0.068          | 0.095  | <b>0.076*</b> | 0.013  | 0.042  | 0.360  | 0.060  | 0.015           |
| <b>Age of<br/>Collection</b>         | 0.104  | 0.147         | -0.144         | 0.067  | <b>0.506*</b> | 0.290          | 0.676  | 0.157         | 0.183  | -0.080 | 2.201  | 0.219  | 0.031           |

### Supplementary Table S3.

**Serum lipid level alterations in the Iberian GD and PD cohort using relative lipid levels. A.** Patient groups compared with the control group. Results obtained, when controlling for sex and age at blood collection. Patients' sex coded as 0 (female) or 1 (male). **B.** Association of PD disease severity, therapy and disease duration with lipid level changes. **C.** Association of GD therapy with lipid level changes. **A.-C.:** Results are presented as analyzed by method #1 (see "Quantification of the levels of lipid groups and their species"). Lipid nomenclature as in the text. Effects of the independent variables on the normalized lipid levels (dependent variables) are expressed by the corresponding estimated regression coefficients, with positive (negative, respectively) coefficients meaning that higher values of the independent variables are associated with higher (lower, respectively) values of the lipid levels. All variables were scaled so that their maximum absolute value was equal to 1. \*, \*\* and \*\*\* denote  $P < 0.05$ ,  $P < 0.01$ , and  $P < 0.001$ , respectively.

| Phospholipids                       | PC           | LPC               | PC/LPC       | P-PC              | PE           | LPE          | PE/LPE       | P-PE         | PS          | LPS           | PS/LPS            | PI           | PG            |
|-------------------------------------|--------------|-------------------|--------------|-------------------|--------------|--------------|--------------|--------------|-------------|---------------|-------------------|--------------|---------------|
| Between-group analyses              |              |                   |              |                   |              |              |              |              |             |               |                   |              |               |
| A. Patient groups vs. control group |              |                   |              |                   |              |              |              |              |             |               |                   |              |               |
| Intercept                           | 0.723**<br>* | 0.172**<br>*      | 4.408**<br>* | 0.012**<br>*      | 0.011**<br>* | 0.007**<br>* | 0.467**<br>* | 0.022**<br>* | 0.008*<br>* | 0.0002**<br>* | 0.611**<br>*      | 0.043**<br>* | 0.0005**<br>* |
| PD (n=100)                          | 0.035**      | -<br>0.038**<br>* | 1.268**<br>* | -<br>0.002**<br>* | 0.002        | 0.0007*      | 0.009        | 0.004**<br>* | -0.002      | 1.54e-05      | -<br>0.209**<br>* | -0.0006      | 2.5e-05       |

|                                                                                                        |                      |                            |                      |                            |               |                |               |                |        |                 |        |                      |                    |
|--------------------------------------------------------------------------------------------------------|----------------------|----------------------------|----------------------|----------------------------|---------------|----------------|---------------|----------------|--------|-----------------|--------|----------------------|--------------------|
| <b>GBA-PD<br/>(n=15)</b>                                                                               | <b>0.031**</b>       | <b>-<br/>0.032**<br/>*</b> | <b>1.085**<br/>*</b> | -0.0008                    | 0.001         | 7.23e-05       | 0.032         | 0.003          | -0.002 | 1.12e-05        | -0.166 | -0.0007              | 4.13e-05           |
| <b>GD (n=70)</b>                                                                                       | <b>0.030**<br/>*</b> | <b>-<br/>0.031**<br/>*</b> | <b>1.131**<br/>*</b> | <b>-<br/>0.002**<br/>*</b> | <b>0.002*</b> | <b>0.0007*</b> | 0.030         | 0.001          | 0.0006 | <b>0.0001**</b> | -0.092 | -0.002               | <b>7.996e-05**</b> |
| <b>Sex</b>                                                                                             | -0.0001              | -0.002                     | 0.019                | 0.0002                     | 0.001         | 0.0001         | 0.039         | 0.001          | 0.001  | 3.5e-05         | 0.030  | -0.002               | 9.99e-06           |
| <b>Age of<br/>Collection</b>                                                                           | -0.016               | -0.001                     | 0.128                | 0.003*                     | <b>0.008*</b> | 0.0004         | <b>0.250*</b> | 0.002          | -0.002 | -4.7e-05        | 0.016  | 0.0051               | -1.78e-05          |
| <b>Within-group analyses</b>                                                                           |                      |                            |                      |                            |               |                |               |                |        |                 |        |                      |                    |
| <b>B. Associations with PD disease severity, medication and disease duration (n = 46; PD patients)</b> |                      |                            |                      |                            |               |                |               |                |        |                 |        |                      |                    |
| <b>Intercept</b>                                                                                       | <b>0.693**<br/>*</b> | <b>0.167**<br/>*</b>       | <b>4.032**<br/>*</b> | 0.0009                     | 0.014         | <b>0.010**</b> | 0.358         | 0.028*         | 0.014  | 0.0003          | 1.196* | <b>0.071**<br/>*</b> | <b>0.0007**</b>    |
| <b>Hoehn and<br/>Yahr scale</b>                                                                        | 0.003                | -0.006                     | 0.212                | 0.004                      | -0.001        | -0.0005        | -0.047        | 0.009          | -0.003 | 5.52e-05        | -0.311 | -0.006               | -0.0001            |
| <b>Dopamine<br/>Agonist</b>                                                                            | 0.012                | <b>-0.017<br/>*</b>        | <b>0.870*</b>        | <b>0.003*</b>              | 0.0002        | -0.0009        | 0.077         | 0.004          | 0.002  | 7.78e-07        | 0.073  | -0.003               | 0.0001             |
| <b>Anti-<br/>Parkinsonian</b>                                                                          | 0.007                | -0.008                     | 0.437                | 0.0009                     | -0.0007       | -0.0007        | 0.027         | 4.64e-05       | 0.002  | -5.6e-05        | 0.186  | 5.83e-05             | 0.0001             |
| <b>Sex</b>                                                                                             | <b>-0.001*</b>       | 0.007                      | -0.373               | 0.002                      | -0.002        | -0.0002        | -0.057        | 0.0004         | 0.0002 | -3.97e-06       | 0.013  | <b>-0.006*</b>       | 3.95e-05           |
| <b>Age of<br/>Collection</b>                                                                           | 0.036                | -0.015                     | 0.679                | 0.009                      | 0.01          | -0.0003        | 0.364         | -0.009         | -0.011 | -2.66e-05       | -0.874 | -0.020               | -0.0002            |
| <b>Disease<br/>Duration</b>                                                                            | 0.025                | -0.014                     | 0.830                | -0.003                     | 0.002         | -0.0008        | 0.258         | -0.007         | -0.001 | 5.36e-05        | -0.153 | -0.001               | -0.0002            |
| <b>C. Associations with GD therapy [(n = 42) vs non-treated (n=27) GD patients]</b>                    |                      |                            |                      |                            |               |                |               |                |        |                 |        |                      |                    |
| <b>Intercept</b>                                                                                       | <b>1.001**<br/>*</b> | <b>0.427**</b>             | <b>6.221**<br/>*</b> | <b>0.598**<br/>*</b>       | 0.017         | <b>0.465**</b> | 0.165         | <b>0.513**</b> | 0.012  | 0.267           | -0.520 | <b>0.541**<br/>*</b> | <b>0.926***</b>    |
| <b>Imiglucerase<br/>(n=12)</b>                                                                         | 0.026                | -0.053                     | 0.418                | 0.028                      | -0.044        | 0.034          | -0.0688       | -0.064         | 0.020  | -0.012          | 0.012  | -0.030               | 0.031              |

|                                      |        |        |                |                |               |               |        |        |        |        |        |        |        |
|--------------------------------------|--------|--------|----------------|----------------|---------------|---------------|--------|--------|--------|--------|--------|--------|--------|
| <b>Velaglucerase<br/>alfa (n=16)</b> | 0.012  | -0.041 | 0.165          | 0.040          | 0.065         | <b>0.106*</b> | -0.039 | -0.054 | 0.015  | 0.017  | -0.030 | -0.022 | -0.003 |
| <b>Eliglustat<br/>(n=6)</b>          | 0.018  | -0.058 | 0.443          | 0.043          | 0.014         | 0.002         | 0.018  | 0.038  | -0.046 | -0.088 | 0.431  | 0.018  | 0.075  |
| <b>Miglustat<br/>(n=8)</b>           | -0.024 | 0.089  | <b>-1.133*</b> | -0.025         | -0.090        | 0.029         | -0.172 | -0.023 | -0.036 | 0.041  | -0.406 | -0.007 | -0.035 |
| <b>Sex</b>                           | -0.020 | 0.026  | -0.323         | <b>-0.060*</b> | <b>0.085*</b> | 0.013         | 0.095  | 0.063  | 0.029  | 0.031  | 0.307  | 0.026  | -0.033 |
| <b>Age of<br/>Collection</b>         | -0.089 | 0.069  | -0.611         | -0.033         | <b>0.535*</b> | 0.147         | 0.631  | 0.128  | 0.210  | -0.149 | 2.266  | 0.161  | -0.124 |
